# Supplementary material for: The influence of large-amplitude librational motion on the hydrogen bond energy for alcohol–water complexes
Source: Royal Society of Chemistry journal article supplement (doi:10.1039/c5cp04321b), 2015-01-01
Supplement: c5cp04321b1.pdf [file c5cp04321b1.pdf]

# The Influence of Large-Amplitude Librational Motion on the Hydrogen Bond Energy of Alcohol-Water Complexes

<sup>a</sup>J. Andersen, <sup>b</sup>J. Heimdal, and <sup>a</sup>R. Wugt Larsen\*

<sup>a</sup>*Department of Chemistry, Technical University of Denmark, Kemitorvet 206, 2800 Kgs. Lyngby, Denmark*

<sup>b</sup>*MAX-IV Laboratory, Lund University, P. O. Box 118, 22100 Lund, Sweden*

## Supporting Information

---

\*Corresponding Author: [rewl@kemi.dtu.dk](mailto:rewl@kemi.dtu.dk)

Table 1: The predicted absolute electronic energy  $E_{abs}$  (Hartrees) and dissociation energies  $D_e$  (kJ/mol) for mixed water/methanol (wm, most stable) and methanol/water (mw, less stable) complexes at the B3LYP, B3LYP-D3 and CCSD(T) levels based on fully geometry optimized monomers at the B3LYP and B3LYP-D3 levels employing the aug-cc-pVTZ basis set (aTZ) together with the difference of electronic dissociation energy between the two different conformers  $\Delta E_e$  (kJ/mol).

|              | B3LYP/aTZ (geo) <sup>a</sup>    |       | B3LYP-CP/aTZ (geo) <sup>a,b</sup>    |       | B3LYP-CP/aTZ (geo) <sup>a,b</sup>    |       |
|--------------|---------------------------------|-------|--------------------------------------|-------|--------------------------------------|-------|
|              | B3LYP/aTZ (el)                  |       | B3LYP/aTZ (el)                       |       | CCSD(T)/aTZ (el)                     |       |
|              | $E_{abs}$                       | $D_e$ | $E_{abs}$                            | $D_e$ | $E_{abs}$                            | $D_e$ |
| w            | -76.4661966                     |       |                                      |       | -76.3423052                          |       |
| m            | -115.7767608                    |       |                                      |       | -115.5623521                         |       |
| mw           | -192.2499676                    | 18.40 | -192.2498672                         | 18.14 | -191.9130798                         | 22.11 |
| wm           | -192.2507980                    | 20.58 | -192.2506884                         | 20.29 | -191.9140428                         | 24.64 |
| $\Delta E_e$ | 2.18                            |       | 2.16                                 |       | 2.53                                 |       |
|              | B3LYP-D3/aTZ (geo) <sup>a</sup> |       | B3LYP-D3-CP/aTZ (geo) <sup>a,b</sup> |       | B3LYP-D3-CP/aTZ (geo) <sup>a,b</sup> |       |
|              | B3LYP-D3/aTZ (el)               |       | B3LYP-D3/aTZ (el)                    |       | CCSD(T)/aTZ (el)                     |       |
|              | $E_{abs}$                       | $D_e$ | $E_{abs}$                            | $D_e$ | $E_{abs}$                            | $D_e$ |
| w            | -76.4662050                     |       |                                      |       | -76.3423045                          |       |
| m            | -115.7778700                    |       |                                      |       | -115.5623487                         |       |
| mw           | -192.2525084                    | 22.14 | -192.2524015                         | 21.86 | -191.9131025                         | 22.18 |
| wm           | -192.2536639                    | 25.18 | -192.2535506                         | 24.88 | -191.9141454                         | 24.92 |
| $\Delta E_e$ | 3.03                            |       | 3.02                                 |       | 2.74                                 |       |

<sup>a</sup> RMS force criterion set to  $10^{-6}$  (atomic units) for all geometry optimizations.

<sup>b</sup> CP = Counterpoise Correction applied.

Table 2: The predicted absolute electronic energy  $E_{abs}$  (Hartrees) and dissociation energies  $D_e$  (kJ/mol) for mixed water/methanol (wm, most stable) and methanol/water (mw, less stable) complexes at the MP2, CCSD(T) and CCSD(T)-F12 levels based on fully geometry optimized monomers at the MP2 level employing the aug-cc-pVTZ (aTZ) and aug-cc-pVQZ (aQZ) basis sets together with the difference of electronic dissociation energy between the two different conformers  $\Delta E_e$  (kJ/mol).

|              | MP2/aTZ (geo) <sup>a</sup><br>MP2/aTZ (el) | MP2-CP/aTZ (geo) <sup>a,b</sup><br>MP2/aTZ (el) | MP2-CP/aTZ (geo) <sup>a,b</sup><br>CCSD(T)/aTZ (el) | MP2-CP/aTZ (geo) <sup>a,b</sup><br>CCSD(T)-F12/aTZ (el) |
|--------------|--------------------------------------------|-------------------------------------------------|-----------------------------------------------------|---------------------------------------------------------|
|              | $E_{abs}$ $D_e$                            | $E_{abs}$ $D_e$                                 | $E_{abs}$ $D_e$                                     | $E_{abs}$ $D_e$                                         |
| w            | -76.3289923                                | -76.3423045                                     | -76.4094478                                         | -76.4094478                                             |
| m            | -115.5290078                               | -115.5623571                                    | -115.6872606                                        | -115.6872606                                            |
| mw           | -191.8663630 21.96                         | -191.9131145 22.19                              | -192.1050794 21.98                                  | -192.1050794 21.98                                      |
| wm           | -191.8675446 25.06                         | -191.9141887 25.01                              | -192.1060874 24.62                                  | -192.1060874 24.62                                      |
| $\Delta E_e$ | 3.10                                       | 2.88                                            | 2.82                                                | 2.65                                                    |
|              | MP2/aQZ (geo) <sup>a</sup><br>MP2/aQZ (el) | MP2-CP/aQZ (geo) <sup>a,b</sup><br>MP2/aQZ (el) | MP2-CP/aQZ (geo) <sup>a,b</sup><br>CCSD(T)/aTZ (el) | MP2-CP/aQZ (geo) <sup>a,b</sup><br>CCSD(T)-F12/aQZ (el) |
|              | $E_{abs}$ $D_e$                            | $E_{abs}$ $D_e$                                 | $E_{abs}$ $D_e$                                     | $E_{abs}$ $D_e$                                         |
| w            | -76.3519184                                | -76.3423119                                     | -76.40946628                                        | -76.42224865                                            |
| m            | -115.5631124                               | -115.5623083                                    | -115.68728478                                       | -115.7054932                                            |
| mw           | -191.9232089 21.47                         | -191.9130617 21.95                              | -192.10513507 22.01                                 | -192.1359375 21.51                                      |
| wm           | -191.9243758 24.54                         | -191.9141373 24.74                              | -192.10614383 24.66                                 | -192.1369574 24.20                                      |
| $\Delta E_e$ | 3.06                                       | 2.91                                            | 2.82                                                | 2.68                                                    |

<sup>a</sup> RMS force criterion set to  $10^{-6}$  (atomic units) for all geometry optimizations.

<sup>b</sup> CP = Counterpoise Correction applied.

Table 3: The predicted absolute electronic energy  $E_{abs}$  (Hartrees) and dissociation energies  $D_e$  (kJ/mol) for mixed water/*t*-butyl alcohol (wt, most stable) and *t*-butyl alcohol/water (tw, less stable) complexes at the B3LYP, B3LYP-D3 and CCSD(T) levels based on fully geometry optimized monomers at the B3LYP and B3LYP-D3 levels employing the aug-cc-pVTZ basis set (aTZ) together with the difference of electronic dissociation energy between the two different conformers  $\Delta E_e$  (kJ/mol).

|              | B3LYP/aTZ (geo) <sup>a</sup>    |       | B3LYP-CP/aTZ (geo) <sup>a,b</sup>    |       | B3LYP-CP/aTZ (geo) <sup>a,b</sup>    |       |
|--------------|---------------------------------|-------|--------------------------------------|-------|--------------------------------------|-------|
|              | B3LYP/aTZ (el)                  |       | B3LYP/aTZ (el)                       |       | CCSD(T)/aTZ (el)                     |       |
|              | $E_{abs}$                       | $D_e$ | $E_{abs}$                            | $D_e$ | $E_{abs}$                            | $D_e$ |
| w            | -76.4661966                     |       |                                      |       | -76.3423052                          |       |
| t            | -233.7744275                    |       |                                      |       | -233.3066355                         |       |
| tw           | -310.2468571                    | 16.36 | -310.2467263                         | 16.02 | -309.6576423                         | 22.85 |
| wt           | -310.2489775                    | 21.93 | -310.2488297                         | 21.54 | -309.6599097                         | 28.80 |
| $\Delta E_e$ | 5.57                            |       | 5.52                                 |       | 5.95                                 |       |
|              | B3LYP-D3/aTZ (geo) <sup>a</sup> |       | B3LYP-D3-CP/aTZ (geo) <sup>a,b</sup> |       | B3LYP-D3-CP/aTZ (geo) <sup>a,b</sup> |       |
|              | B3LYP-D3/aTZ (el)               |       | B3LYP-D3/aTZ (el)                    |       | CCSD(T)/aTZ (el)                     |       |
|              | $E_{abs}$                       | $D_e$ | $E_{abs}$                            | $D_e$ | $E_{abs}$                            | $D_e$ |
| w            | -76.4662050                     |       |                                      |       | -76.3423045                          |       |
| t            | -233.7849828                    |       |                                      |       | -233.3066616                         |       |
| tw           | -310.2596343                    | 22.18 | -310.2594915                         | 21.80 | -309.6578720                         | 23.38 |
| wt           | -310.2628379                    | 30.59 | -310.2626699                         | 30.15 | -309.6604021                         | 30.03 |
| $\Delta E_e$ | 8.41                            |       | 8.34                                 |       | 6.64                                 |       |

<sup>a</sup> RMS force criterion set to  $10^{-6}$  (atomic units) for all geometry optimizations.

<sup>b</sup> CP = Counterpoise Correction applied.

Table 4: The predicted absolute electronic energy  $E_{abs}$  (Hartrees) and dissociation energies  $D_e$  (kJ/mol) for mixed water/*t*-butyl alcohol (wt, most stable) and *t*-butyl alcohol/water (tw, less stable) complexes at the MP2, CCSD(T) and CCSD(T)-F12 levels based on fully geometry optimized monomers at the MP2 level employing the aug-cc-pVTZ (aTZ) basis set together with the difference of electronic dissociation energy between the two different conformers  $\Delta E_e$  (kJ/mol).

|              | MP2/aTZ (geo) <sup>a</sup> |       | MP2-CP/aTZ (geo) <sup>a,b</sup> |       | MP2-CP/aTZ (geo) <sup>a,b</sup> |       | MP2/aTZ (geo) <sup>a,b</sup> |       |
|--------------|----------------------------|-------|---------------------------------|-------|---------------------------------|-------|------------------------------|-------|
|              | MP2/aTZ (el)               |       | MP2/aTZ (el)                    |       | CCSD(T)/aTZ (el)                |       | CCSD(T)-F12/aTZ (el)         |       |
|              | $E_{abs}$                  | $D_e$ | $E_{abs}$                       | $D_e$ | $E_{abs}$                       | $D_e$ | $E_{abs}$                    | $D_e$ |
| w            | -76.3289923                |       |                                 |       | -76.3423045                     |       | -76.4094478                  |       |
| t            | -233.2210850               |       |                                 |       | -233.3066372                    |       | -233.6062126                 |       |
| tw           | -309.5589091               | 23.19 | -309.5578621                    | 20.44 | -309.6578587                    | 23.41 | -310.0243343                 | 22.77 |
| wt           | -309.5615378               | 30.09 | -309.5602656                    | 26.75 | -309.6603926                    | 30.06 | -310.0268163                 | 29.29 |
| $\Delta E_e$ | 6.90                       |       | 6.31                            |       | 6.65                            |       | 6.52                         |       |

<sup>a</sup> RMS force criterion set to  $10^{-6}$  (atomic units) for all geometry optimizations.

<sup>b</sup> CP = Counterpoise Correction applied.

Table 5: The predicted harmonic vibrational zero-point energies (ZPE) for mixed isotopic complexes of water (w) with methanol (m) and *t*-butyl alcohol (t) at the MP2/aug-cc-pVTZ level.

|                  | H <sub>2</sub> O-CH <sub>3</sub> OH                      | CH <sub>3</sub> OH-H <sub>2</sub> O                      | H <sub>2</sub> O-CD <sub>3</sub> OD                      | CD <sub>3</sub> OD-H <sub>2</sub> O                      | D <sub>2</sub> O-CH <sub>3</sub> OH                      | CH <sub>3</sub> OH-D <sub>2</sub> O                      |
|------------------|----------------------------------------------------------|----------------------------------------------------------|----------------------------------------------------------|----------------------------------------------------------|----------------------------------------------------------|----------------------------------------------------------|
| ZPE <sub>m</sub> | 136.18                                                   |                                                          | 101.83                                                   |                                                          | 136.18                                                   |                                                          |
| ZPE <sub>w</sub> | 56.21                                                    |                                                          | 56.21                                                    |                                                          | 40.89                                                    |                                                          |
| ZPE              | 200.19                                                   | 198.98                                                   | 165.56                                                   | 163.94                                                   | 183.32                                                   | 182.92                                                   |
| $\Delta$ ZPE     | 7.80                                                     | 6.59                                                     | 7.52                                                     | 5.90                                                     | 6.25                                                     | 5.85                                                     |
|                  | H <sub>2</sub> O-<br>C(CH <sub>3</sub> ) <sub>3</sub> OH | C(CH <sub>3</sub> ) <sub>3</sub> OH-<br>H <sub>2</sub> O | H <sub>2</sub> O-<br>C(CD <sub>3</sub> ) <sub>3</sub> OD | C(CD <sub>3</sub> ) <sub>3</sub> OD-<br>H <sub>2</sub> O | D <sub>2</sub> O-<br>C(CH <sub>3</sub> ) <sub>3</sub> OH | C(CH <sub>3</sub> ) <sub>3</sub> OH-<br>D <sub>2</sub> O |
| ZPE <sub>t</sub> | 358.61                                                   |                                                          | 273.10                                                   |                                                          | 358.61                                                   |                                                          |
| ZPE <sub>w</sub> | 56.21                                                    |                                                          | 56.21                                                    |                                                          | 40.89                                                    |                                                          |
| ZPE              | 423.22                                                   | 421.16                                                   | 337.02                                                   | 334.75                                                   | 405.93                                                   | 404.81                                                   |
| $\Delta$ ZPE     | 8.40                                                     | 6.34                                                     | 8.06                                                     | 5.74                                                     | 6.77                                                     | 5.57                                                     |
